# Supplementary material for: Context-Dependent Roles for Toll-Like Receptors 2 and 9 in the Pathogenesis of Staphylococcus aureus Osteomyelitis
Source: PubMed Central journal article supplement (PMC9670883; doi:10.1128/iai.00417-22), 2022-10-13
Supplement: iai.00417-22-s0001.pdf [file iai.00417-22-s0001.pdf]

## Supplementary Figures and Tables

Context-dependent roles for Toll-like receptors 2 and 9 in the pathogenesis of *Staphylococcus aureus* osteomyelitis

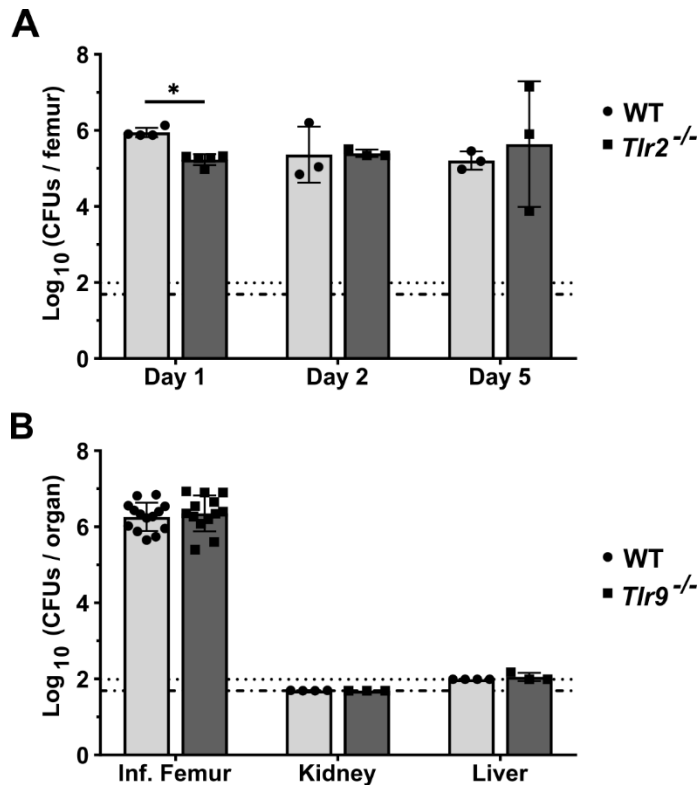

**Supplemental Figure 1. Mice deficient in TLR2 or TLR9 do not incur increased bacterial burdens during osteomyelitis. A-B)** WT and *Tlr2*<sup>-/-</sup> mice (**A**) or WT and *Tlr9*<sup>-/-</sup> mice (**B**) were subjected to osteomyelitis by intraosseous injection of 10<sup>5</sup> (**A**) or 10<sup>6</sup> (**B**) CFUs of WT *S. aureus*. Infected femurs, kidneys, and livers were extracted on the indicated day post-infection (**A**) or on day 14 post-infection (**B**). Organ homogenates were plated for CFU enumeration. Error bars denote SD. Dotted lines indicate Log transformed limits of detection. **A)** Femurs were harvested at day 1 (WT n = 4, *Tlr2*<sup>-/-</sup> n = 5), day 2 (WT n = 3, *Tlr2*<sup>-/-</sup> n = 3), or day 5 (WT n = 3, *Tlr2*<sup>-/-</sup> n = 3). CFU burdens were compared between genotypes by Mann-Whitney U test. \*p < 0.05. If not denoted with asterisks, statistical difference between genotypes was not significant. **B)** CFU burdens were compared by t-test (femur) or Mann-Whitney U test (liver, kidney). If not denoted with asterisks, statistical

difference between genotypes was not significant. Results compiled from 3 independent experiments. For femurs, n = 15 for WT and for n = 14 for *Tlr9*<sup>-/-</sup>. For liver and kidneys, n = 4 for WT and n = 3 for *Tlr9*<sup>-/-</sup>.

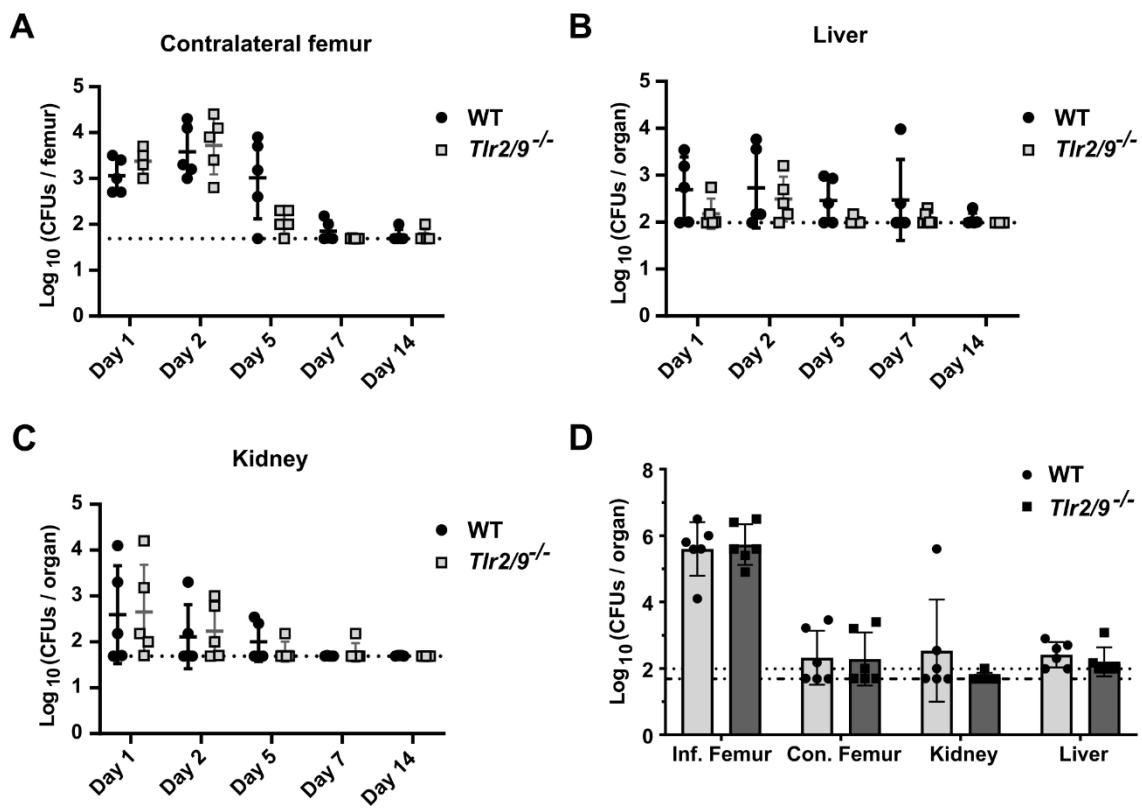

**Supplemental Figure 2. Mice deficient in TLR2 and TLR9 do not incur increased bacterial burdens over multiple infection time points. A-C)** WT and *Tlr2/9*<sup>-/-</sup> mice were subjected to osteomyelitis by intraosseous injection of 10<sup>6</sup> CFUs of *S. aureus*. Mice were euthanized on the indicated day post-infection and organs were collected for CFU enumeration. CFU burdens from each organ were compared between genotypes for each time point using a t-test or Mann-Whitney U test, depending on normality of the data. \*p < 0.05. If not denoted with asterisks, statistical difference between genotypes was not significant. Error bars denote SD. Dotted lines represent the Log<sub>10</sub> transformed limits of detection. For days 1, 2, 5, and 14, n = 5 per group. For day 7, n = 6 per group. **D)** WT and *Tlr2/9*<sup>-/-</sup> mice were subjected to osteomyelitis by intraosseous injection of 10<sup>5</sup> CFUs of WT *S. aureus*. Mice were euthanized on day 7 post-infection. Organs were extracted and homogenized for CFU enumeration. CFU burdens were compared between genotypes using a Mann-Whitney U test. No significant differences were detected. n = 5 per group. Error is plotted as ± SD. Dotted lines indicate Log<sub>10</sub> transformed limits of detection.

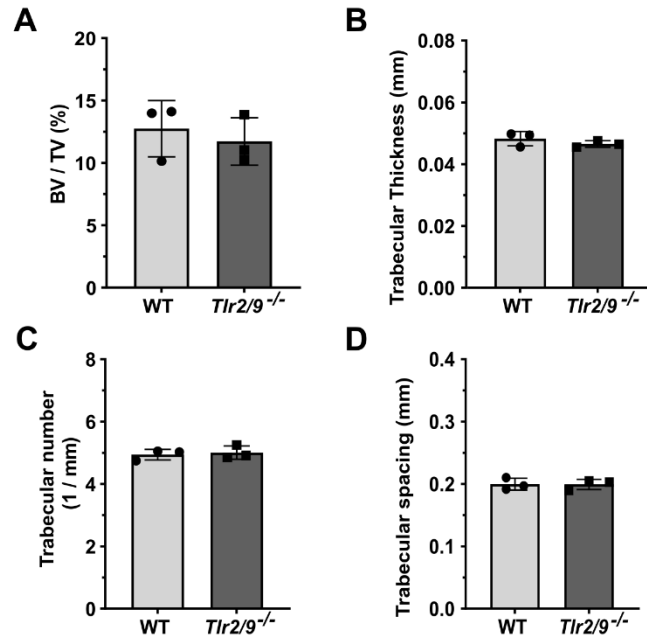

**Supplemental Figure 3. WT and *Tlr2/9*<sup>-/-</sup> mice have comparable trabecular bone measurements at baseline.** 8-9-week-old female mice were euthanized, and femurs were extracted, fixed, and imaged by  $\mu$ CT. Parameters of trabecular bone including %BV/TV (**A**), trabecular thickness (**B**), number (**C**), and spacing (**D**) were measured. Comparisons were made between genotypes by Mann-Whitney U test. No significant differences were detected. n = 3 per group. Error bars denote SD.

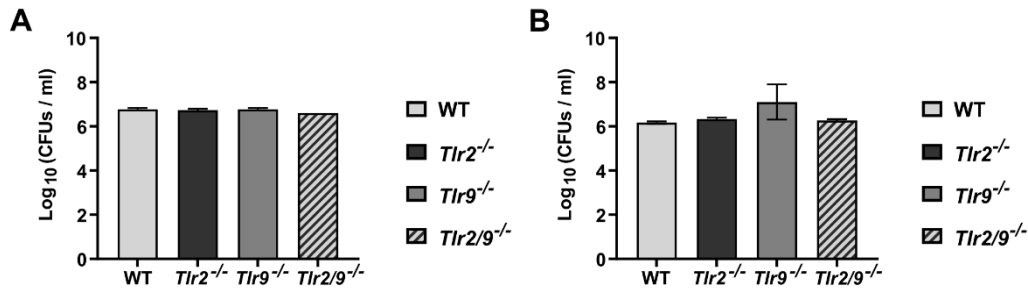

**Supplemental Figure 4. Bacterial load is not affected by loss of TLR2 and/or 9. A-**  
**B)** BMDMs of the indicated genotype were primed with RANKL + CMG 14-12 supernatant for 2 days. RANKL was withdrawn and cells were infected with WT *S. aureus* at a MOI of 25. CFUs were enumerated from cell lysates at the indicated time point. Dotted lines indicate the limit of detection. For all, n = 3 technical replicates per group. **A)** Log<sub>10</sub> CFUs were analyzed by nonparametric one-way ANOVA. A Kruskal-Wallis post-hoc test was used to compare CFUs between knockout and WT cells and no significant differences were detected. **B)** After 2 days of infection, cells were lysed, serially diluted, and plated to measure CFUs. Log<sub>10</sub> CFU burdens were analyzed by non-parametric one-way ANOVA. No significant differences were detected.

**Supplemental Table 1.** BMDMs were cultured in media containing 35 ng/ml RANKL + CMG 14-12 supernatant for 2 days. Cells were then changed to RANKL-free media and stimulated with 7% vol/vol of supernatant from the *Δpsma1-4 Δspa* strain. Cytokine responses were measured after 12 h of stimulation. Average cytokine in pg/ml is shown ± standard deviation (SD).

\*Under LOD measurement used in mean and SD calculation or only measured value reported

#One or more measurements omitted from mean and SD calculation because the coefficient of variation for duplicate samples was greater than 30% or because the measured value exceeded the detection maximum.

| <b>Supplemental Table 1: RANKL → No RANKL</b> |                       |                                                                       |                                                                                              |                                                                                              |                                                                                                |
|-----------------------------------------------|-----------------------|-----------------------------------------------------------------------|----------------------------------------------------------------------------------------------|----------------------------------------------------------------------------------------------|------------------------------------------------------------------------------------------------|
| <b>Cytokine</b>                               | <b>WT<br/>vehicle</b> | <b>WT<br/><math>\Delta psma1-4</math><br/><math>\Delta spa</math></b> | <b><i>Tlr2</i><sup>-/-</sup><br/><math>\Delta psma1-4</math><br/><math>\Delta spa</math></b> | <b><i>Tlr9</i><sup>-/-</sup><br/><math>\Delta psma1-4</math><br/><math>\Delta spa</math></b> | <b><i>Tlr2/9</i><sup>-/-</sup><br/><math>\Delta psma1-4</math><br/><math>\Delta spa</math></b> |
| <b>G-CSF</b>                                  | 3.24 ± 0.29           | 2235.67 ± 258.11                                                      | 8.85 ± 6.74                                                                                  | 3059.67 ± 150.07                                                                             | 3.06 ± 0.47                                                                                    |
| <b>GM-CSF</b>                                 | 30.21 ± 1.76          | 29.58 ± 5.60                                                          | 24.17 ± 7.50                                                                                 | 31.93 ± 3.19                                                                                 | 26.05 ± 1.84                                                                                   |
| <b>INF<math>\gamma</math></b>                 | 2.27 ± 0.27           | 3.29 ± 0.32                                                           | 1.86 ± 0.75                                                                                  | 4.36 ± 0.75                                                                                  | 1.65 ± 0.10                                                                                    |
| <b>IL-1<math>\alpha</math></b>                | 28.57 ± 2.78          | 63.17 ± 13.08                                                         | 13.46 ± 7.48                                                                                 | 79.29 ± 17.29                                                                                | 27.97 ± 8.19                                                                                   |
| <b>IL-1<math>\beta</math></b>                 | 2.60 ± 0.84           | 2.46 ± 0.58                                                           | 1.81 ± 0.66                                                                                  | 3.57 ± 0.52                                                                                  | *1.75 ± 0.75                                                                                   |
| <b>IL-2</b>                                   | 11.86 ± 0.47          | 9.37 ± 0.35                                                           | 9.22 ± 1.43                                                                                  | 12.12 ± 5.38                                                                                 | 9.74 ± 2.37                                                                                    |
| <b>IL-4</b>                                   | #0.75 ± 0.19          | *0.70 ± 0.16                                                          | 0.63 ± 0.12                                                                                  | 0.79 ± 0.23                                                                                  | *0.55 ± .01                                                                                    |
| <b>IL-5</b>                                   | 7.03 ± 1.99           | 11.66 ± 2.13                                                          | 5.94 ± 1.50                                                                                  | #13.50 ± 0.27                                                                                | 6.15 ± 1.86                                                                                    |
| <b>IL-6</b>                                   | 5.10 ± 1.31           | 129.47 ± 11.96                                                        | 6.31 ± 3.50                                                                                  | 140.89 ± 13.06                                                                               | 5.68 ± 2.15                                                                                    |
| <b>IL-7</b>                                   | 2.27 ± 0.65           | 2.16 ± 0.54                                                           | 1.85 ± 0.46                                                                                  | 2.76 ± 1.11                                                                                  | 1.88 ± 0.55                                                                                    |
| <b>IL-9</b>                                   | 67.59 ± 5.83          | 69.10 ± 7.39                                                          | 41.74 ± 11.86                                                                                | 72.54 ± 18.84                                                                                | 48.36 ± 10.83                                                                                  |
| <b>IL-10</b>                                  | 3.90 ± 0.91           | 221.52 ± 30.61                                                        | 4.27 ± 1.35                                                                                  | 213.15 ± 3.82                                                                                | 4.38 ± 0.36                                                                                    |
| <b>IL-12 (p40)</b>                            | 2.11 ± 0.80           | 2.64 ± 0.45                                                           | 1.83 ± 0.95                                                                                  | 4.49 ± 1.23                                                                                  | 2.09 ± 0.54                                                                                    |
| <b>IL-12 (p70)</b>                            | 13.73 ± 2.92          | 11.52 ± 3.36                                                          | 8.74 ± 1.27                                                                                  | 14.70 ± 4.21                                                                                 | 8.37 ± 3.97                                                                                    |
| <b>IL-13</b>                                  | 2.56 ± 0.16           | 3.70 ± 0.54                                                           | 1.16 ± 0.14                                                                                  | 3.65 ± 0.75                                                                                  | 1.62 ± 0.72                                                                                    |
| <b>IL-15</b>                                  | 14.71 ± 3.41          | 19.96 ± 5.68                                                          | 13.02 ± 5.11                                                                                 | 21.72 ± 7.95                                                                                 | 14.70 ± 1.86                                                                                   |
| <b>IL-17</b>                                  | 0.77 ± 0.11           | 15.63 ± 0.89                                                          | *0.60 ± 0.14                                                                                 | 13.30 ± 0.50                                                                                 | *0.64 ± 0.21                                                                                   |
| <b>IP-10</b>                                  | 251.70 ± 49.17        | 428.80 ± 86.71                                                        | 115.70 ± 10.57                                                                               | 345.77 ± 78.95                                                                               | 188.17 ± 32.92                                                                                 |
| <b>KC</b>                                     | 29.39 ± 1.50          | 1345.33 ± 208.46                                                      | 50.10 ± 14.27                                                                                | 1397.33 ± 240.35                                                                             | 31.39 ± 2.11                                                                                   |
| <b>MCP-1</b>                                  | 194.88 ± 23.34        | 1257.00 ± 143.95                                                      | 217.59 ± 18.15                                                                               | 1063.87 ± 122.33                                                                             | 319.46 ± 9.10                                                                                  |
| <b>MIP-1<math>\alpha</math></b>               | 32.39 ± 1.73          | 1718.00 ± 239.06                                                      | 50.79 ± 11.99                                                                                | 1181.67 ± 19.22                                                                              | 44.94 ± 4.76                                                                                   |
| <b>MIP-1<math>\beta</math></b>                | 51.12 ± 4.46          | 8136.67 ± 1852.34                                                     | 88.19 ± 10.37                                                                                | 5285.00 ± 52.46                                                                              | 78.43 ± 5.50                                                                                   |
| <b>MIP-2</b>                                  | 92.75 ± 8.76          | 13168.00 ± 1174.41                                                    | 636.84 ± 44.73                                                                               | #13164.00                                                                                    | 324.89 ± 47.91                                                                                 |
| <b>RANTES</b>                                 | 3.96 ± 0.54           | 13.32 ± 1.42                                                          | 2.76 ± 0.60                                                                                  | 13.12 ± 0.55                                                                                 | 3.39 ± 0.41                                                                                    |
| <b>TNF<math>\alpha</math></b>                 | 5.06 ± 0.81           | 27.59 ± 1.80                                                          | 6.38 ± 1.38                                                                                  | 28.40 ± 1.81                                                                                 | 5.04 ± 0.43                                                                                    |



**Supplemental Table 2.** BMDMs were cultured in media containing CMG 14-12 supernatant for 2 days. Cells were then stimulated with 7% vol/vol of supernatant from the  $\Delta psma1-4 \Delta spa$  strain. Cytokine responses were measured after 12 h of stimulation. Average cytokine in pg/ml is shown  $\pm$  SD.

\*Under LOD measurement used in mean and SD calculation or only measured value reported

#One or more measurements omitted from mean and SD calculation because the coefficient of variation for duplicate samples was greater than 30% or because the measured value exceeded the detection maximum

<X All measurements were under detection minimum

>X All measurements were over detection maximum

| Supplemental Table 2: No RANKL → No RANKL |                 |                                  |                                                          |                                                          |                                                            |
|-------------------------------------------|-----------------|----------------------------------|----------------------------------------------------------|----------------------------------------------------------|------------------------------------------------------------|
| Cytokine                                  | WT vehicle      | WT $\Delta psma1-4$ $\Delta spa$ | <i>Tlr2</i> <sup>-/-</sup> $\Delta psma1-4$ $\Delta spa$ | <i>Tlr9</i> <sup>-/-</sup> $\Delta psma1-4$ $\Delta spa$ | <i>Tlr2/9</i> <sup>-/-</sup> $\Delta psma1-4$ $\Delta spa$ |
| G-CSF                                     | *0.89 ± 0.30    | 2951.67 ± 284.82                 | *1.05 ± 0.41                                             | 3657.67 ± 515.04                                         | 0.93 ± 0.15                                                |
| GM-CSF                                    | 12.70 ± 3.80    | *13.38 ± 8.20                    | *7.56 ± 3.33                                             | 25.38 ± 5.67                                             | 11.45 ± 1.01                                               |
| INF $\gamma$                              | *0.83 ± 0.34    | 2.18 ± 0.52                      | *0.76 ± 0.23                                             | 3.39 ± 0.61                                              | *0.63 ± 0.16                                               |
| IL-1 $\alpha$                             | 11.31 ± 4.94    | 74.09 ± 9.49                     | *11.14 ± 6.01                                            | 96.79 ± 2.53                                             | 13.74 ± 6.08                                               |
| IL-1 $\beta$                              | *1.197 ± 0.51   | 2.16 ± 0.93                      | <0.90                                                    | 3.58 ± 2.24                                              | <0.90                                                      |
| IL-2                                      | 3.83 ± 0.80     | 4.85 ± 1.34                      | #7.93 ± 1.05                                             | 9.03 ± 2.55                                              | 5.81 ± 1.71                                                |
| IL-4                                      | <0.55           | <0.55                            | <0.55                                                    | <0.55                                                    | <0.55                                                      |
| IL-5                                      | 2.02 ± 0.83     | 3.49 ± 1.13                      | 1.37 ± 0.32                                              | 4.54 ± 0.68                                              | 2.01 ± 0.13                                                |
| IL-6                                      | 0.85 ±          | 265.87 ± 44.93                   | 1.32 ± 0.92                                              | 512.12 ± 177.25                                          | 1.46 ± 0.37                                                |
| IL-7                                      | <0.77           | <0.77                            | <0.77                                                    | 1.28 ± 0.12                                              | *0.78 ± 0.02                                               |
| IL-9                                      | 15.15 ± 6.29    | 59.97 ± 9.00                     | 19.78 ± 12.84                                            | 72.12 ± 7.96                                             | 15.17 ± 3.20                                               |
| IL-10                                     | 1.61 ± 0.12     | 304.30 ± 30.61                   | *1.73 ± 0.88                                             | 313.69 ± 19.98                                           | 1.41 ± 0.42                                                |
| IL-12 (p40)                               | *1.73 ± 1.26    | *2.22 ± 1.56                     | *1.14                                                    | 3.07 ± 0.26                                              | 2.44 ± 0.65                                                |
| IL-12 (p70)                               | *1.86 ± 0.88    | *3.50 ± 2.39                     | 4.02 ± 0.55                                              | 6.30 ± 2.46                                              | 3.64 ± 0.77                                                |
| IL-13                                     | 2.93 ± 0.89     | 4.36 ± 0.95                      | #1.48 ± 0.10                                             | 7.16 ± 1.46                                              | 2.10 ± 0.96                                                |
| IL-15                                     | *4.02 ± 3.66    | *3.41 ± 1.59                     | 3.26 ± 1.97                                              | 8.28 ± 3.32                                              | 3.36 ± 2.33                                                |
| IL-17                                     | 2.74 ± 0.67     | 26.00 ± 1.80                     | #1.83 ± 0.64                                             | 28.04 ± 1.92                                             | 1.41 ± 0.13                                                |
| IP-10                                     | 632.80 ± 170.51 | 483.16 ± 122.59                  | #273.16 ± 21.58                                          | 757.18 ± 162.12                                          | 477.56 ± 253.45                                            |
| KC                                        | 67.46 ± 16.55   | 3020.67 ± 578.69                 | 87.73 ± 17.13                                            | 4079.00 ± 465.54                                         | 66.83 ± 13.38                                              |
| MCP-1                                     | 721.07 ± 30.04  | 2511.00 ± 398.65                 | #620.58 ± 17.79                                          | 4016.00 ± 1535.26                                        | 878.09 ± 71.08                                             |
| MIP-1 $\alpha$                            | 226.94 ± 18.88  | #9878.00                         | #200.56 ± 1.41                                           | >15053                                                   | 168.96 ± 13.96                                             |
| MIP-1 $\beta$                             | 728.12 ± 85.37  | >9967                            | #611.94 ± 26.57                                          | >9967                                                    | 463.52 ± 36.68                                             |
| MIP-2                                     | 462.50 ± 72.45  | >14319                           | 1993.67 ± 295.11                                         | >14319                                                   | 1142.00 ± 108.57                                           |
| RANTES                                    | 4.47 ± 1.24     | 56.32 ± 7.26                     | 2.81 ± 1.44                                              | 66.56 ± 10.24                                            | 4.12 ± 1.09                                                |
| TNF $\alpha$                              | 5.68 ± 0.92     | 101.80 ± 12.72                   | 7.34 ± 1.61                                              | 32.12 ± 21.75                                            | 5.34 ± 0.46                                                |

**Supplemental Table 3.** BMDMs were cultured in media containing 35 ng/ml RANKL + CMG 14-12 supernatant for 2 days. RANKL was continued and cells were stimulated with 7% vol/vol of supernatant from the  $\Delta psma1-4 \Delta spa$  strain. Cytokine responses were measured after 12 h of stimulation. Average cytokine in pg/ml is shown  $\pm$  SD.

\*Under LOD measurement used in mean and SD calculation or only measured value reported

#One measurement omitted from mean and SD calculation because the coefficient of variation for duplicate samples was greater than 30%.

| Supplemental Table 3: RANKL → RANKL |                 |                                  |                                                          |                                                          |                                                            |
|-------------------------------------|-----------------|----------------------------------|----------------------------------------------------------|----------------------------------------------------------|------------------------------------------------------------|
| Cytokine                            | WT vehicle      | WT $\Delta psma1-4$ $\Delta spa$ | <i>Tlr2</i> <sup>-/-</sup> $\Delta psma1-4$ $\Delta spa$ | <i>Tlr9</i> <sup>-/-</sup> $\Delta psma1-4$ $\Delta spa$ | <i>Tlr2/9</i> <sup>-/-</sup> $\Delta psma1-4$ $\Delta spa$ |
| G-CSF                               | #2.62 ± 0.00    | 1556.00 ± 448.64                 | 3.73 ± 0.82                                              | 1771.00 ± 251.81                                         | 4.92 ± 1.20                                                |
| GM-CSF                              | 29.17 ± 8.09    | *22.27 ± 16.62                   | 32.70 ± 1.47                                             | 28.34 ± 4.49                                             | 29.45 ± 1.93                                               |
| INF $\gamma$                        | 1.67 ± 0.25     | 2.23 ± 0.88                      | 2.61 ± 0.39                                              | 2.74 ± 0.18                                              | 2.31 ± 0.39                                                |
| IL-1 $\alpha$                       | 29.51 ± 15.56   | 67.61 ± 22.26                    | 48.67 ± 10.47                                            | 73.12 ± 6.90                                             | 39.94 ± 8.50                                               |
| IL-1 $\beta$                        | 1.83 ± 1.13     | *2.30 ± 1.28                     | 2.59 ± 0.28                                              | 3.43 ± 0.66                                              | 1.97 ± 0.59                                                |
| IL-2                                | 9.70 ± 0.68     | 14.22 ± 1.11                     | 18.49 ± 2.98                                             | 14.09 ± 2.63                                             | 15.77 ± 3.80                                               |
| IL-4                                | *0.60 ± 0.09    | *0.71 ± 0.09                     | 0.86 ± 0.13                                              | 0.66 ± 0.00                                              | 0.63 ± 0.04                                                |
| IL-5                                | 6.44 ± 2.08     | 8.25 ± 1.60                      | 7.32 ± 1.73                                              | 7.11 ± 1.09                                              | 6.97 ± 1.35                                                |
| IL-6                                | #4.86 ± 0.47    | 94.94 ± 30.76                    | 7.23 ± 2.43                                              | 106.23 ± 12.77                                           | 8.94 ± 1.47                                                |
| IL-7                                | 2.34 ± 1.55     | *1.58 ± 0.74                     | 2.76 ± 0.54                                              | 2.37 ± 0.13                                              | 2.44 ± 0.35                                                |
| IL-9                                | 55.79 ± 8.09    | 66.22 ± 10.71                    | 79.82 ± 7.57                                             | 77.21 ± 6.63                                             | 73.25 ± 10.50                                              |
| IL-10                               | 4.69 ± 1.65     | 253.46 ± 44.59                   | 11.26 ± 0.76                                             | 249.53 ± 11.41                                           | 9.29 ± 2.01                                                |
| IL-12 (p40)                         | *2.12 ± 1.25    | *1.90 ± 1.04                     | 3.61 ± 0.70                                              | 3.57 ± 0.29                                              | 2.19 ± 0.45                                                |
| IL-12 (p70)                         | #12.21 ± 0.59   | 10.83 ± 3.99                     | 14.84 ± 0.96                                             | 15.94 ± 2.48                                             | 16.22 ± 3.13                                               |
| IL-13                               | 3.08 ± 0.46     | 3.10 ± 1.48                      | 2.17 ± 0.67                                              | 3.36 ± 0.71                                              | 2.09 ± 0.31                                                |
| IL-15                               | 14.62 ± 11.88   | *13.39 ± 10.18                   | 19.18 ± 4.09                                             | 21.32 ± 1.22                                             | 23.27 ± 6.51                                               |
| IL-17                               | *0.65 ± 0.13    | 12.23 ± 2.68                     | 0.77 ± 0.13                                              | 9.39 ± 1.06                                              | 0.81 ± 0.07                                                |
| IP-10                               | 455.73 ± 110.01 | 425.95 ± 250.95                  | 188.92 ± 67.60                                           | 329.83 ± 89.40                                           | 205.14 ± 54.59                                             |
| KC                                  | #38.86 ± 1.08   | 984.60 ± 239.27                  | 52.59 ± 2.14                                             | 1051.55 ± 119.45                                         | 45.36 ± 4.29                                               |
| MCP-1                               | 174.03 ± 27.57  | 932.05 ± 255.42                  | 161.24 ± 5.99                                            | 776.28 ± 42.69                                           | 247.82 ± 6.68                                              |
| MIP-1 $\alpha$                      | 30.15 ± 3.95    | 925.49 ± 188.22                  | 38.05 ± 3.92                                             | 650.46 ± 35.97                                           | 37.42 ± 0.23                                               |
| MIP-1 $\beta$                       | 45.99 ± 8.48    | 3931.33 ± 1472.54                | 65.75 ± 4.46                                             | 2186.00 ± 259.28                                         | 65.24 ± 1.70                                               |
| MIP-2                               | 91.93 ± 25.85   | 10484.67 ± 2100.01               | 746.96 ± 30.80                                           | 13295.33 ± 1008.15                                       | 503.89 ± 46.82                                             |
| RANTES                              | 4.17 ± 0.48     | 11.17 ± 2.96                     | 4.03 ± 0.28                                              | 11.34 ± 1.35                                             | 4.36 ± 0.08                                                |
| TNF $\alpha$                        | 6.95 ± 0.91     | 25.08 ± 4.52                     | 9.67 ± 1.16                                              | 27.46 ± 1.00                                             | 9.34 ± 0.35                                                |

**Supplemental Table 4.** BMDMs were cultured in media with CMG 14-12 supernatant for 2 days. Cells were then moved to media containing 35 ng/ml RANKL + CMG 14-12 supernatant and stimulated with 7% vol/vol of supernatant from the  $\Delta psma1-4 \Delta spa$  strain. Cytokine responses were measured after 12 h of stimulation. Average cytokine in pg/ml is shown  $\pm$  SD.

\*Under LOD measurement used in mean and SD calculation or only measured value reported

#One or more measurements omitted from mean and SD calculation because the coefficient of variation for duplicate samples was greater than 30% or because the measured value exceeded the detection maximum.

>X All measurements were over detection maximum

| Supplemental Table 4: No RANKL → RANKL |                  |                                  |                                            |                                            |                                              |
|----------------------------------------|------------------|----------------------------------|--------------------------------------------|--------------------------------------------|----------------------------------------------|
| Cytokine                               | WT vehicle       | WT $\Delta psma1-4$ $\Delta spa$ | $Tlr2^{-/-}$ $\Delta psma1-4$ $\Delta spa$ | $Tlr9^{-/-}$ $\Delta psma1-4$ $\Delta spa$ | $Tlr2/9^{-/-}$ $\Delta psma1-4$ $\Delta spa$ |
| <b>G-CSF</b>                           | *0.86 ± 0.32     | 2786.00 ± 176.60                 | *1.10 ± 0.45                               | 2507.33 ± 156.30                           | *0.99 ± 0.37                                 |
| <b>GM-CSF</b>                          | 13.42 ± 1.67     | 21.33 ± 2.46                     | 8.32 ± 2.14                                | 23.02 ± 2.96                               | *8.26 ± 3.77                                 |
| <b>INF<math>\gamma</math></b>          | *0.68 ± 0.08     | 3.58 ± 1.02                      | 0.86 ± 0.20                                | 3.42 ± 1.18                                | *0.80 ± 0.28                                 |
| <b>IL-1<math>\alpha</math></b>         | 12.68 ± 2.95     | 86.24 ± 12.75                    | 16.46 ± 5.41                               | 80.67 ± 6.67                               | 14.64 ± 14.07                                |
| <b>IL-1<math>\beta</math></b>          | *1.11 ± 0.37     | 4.99 ± 0.35                      | *1.11 ± 0.37                               | 4.22 ± 1.40                                | <0.90                                        |
| <b>IL-2</b>                            | 5.21 ± 1.19      | 10.30 ± 1.30                     | 6.59 ± 2.86                                | 6.86 ± 1.97                                | 5.11 ± 3.39                                  |
| <b>IL-4</b>                            | <0.55            | <0.55                            | <0.55                                      | <0.55                                      | <0.55                                        |
| <b>IL-5</b>                            | 1.44 ± 0.42      | 3.64 ± 0.45                      | 1.72 ± 0.24                                | 3.04 ± 0.52                                | 1.37 ± 0.12                                  |
| <b>IL-6</b>                            | 1.17 ± 0.58      | 364.28 ± 20.56                   | 2.06 ± 0.74                                | 481.89 ± 96.28                             | 1.45 ± 0.58                                  |
| <b>IL-7</b>                            | *0.88 ± 0.19     | *0.84 ± 0.09                     | *0.83 ± 0.10                               | *0.86 ± 0.15                               | *0.88 ± 0.19                                 |
| <b>IL-9</b>                            | 17.10 ± 7.63     | 74.87 ± 5.26                     | 18.73 ± 6.33                               | 64.50 ± 5.38                               | 17.16 ± 5.01                                 |
| <b>IL-10</b>                           | 2.90 ± 0.31      | 342.56 ± 40.25                   | 3.24 ± 0.51                                | 302.45 ± 13.55                             | 1.94 ± 0.24                                  |
| <b>IL-12 (p40)</b>                     | 2.51 ± 0.75      | 4.24 ± 0.76                      | *1.01 ± 0.25                               | 4.97 ± 0.68                                | 1.79 ± 1.27                                  |
| <b>IL-12 (p70)</b>                     | 1.69 ± 0.40      | #8.90 ± 4.09                     | *2.21 ± 0.86                               | 4.54 ± 0.60                                | *2.41 ± 1.11                                 |
| <b>IL-13</b>                           | 4.70 ± 0.48      | 5.32 ± 0.62                      | 1.58 ± 0.15                                | 7.08 ± 1.81                                | 1.92 ± 0.48                                  |
| <b>IL-15</b>                           | *4.02 ± 3.66     | 8.48 ± 3.66                      | *3.22 ± 2.45                               | 7.39 ± 4.17                                | *2.91 ± 1.38                                 |
| <b>IL-17</b>                           | 1.42 ± 0.10      | 27.74 ± 1.73                     | 1.50 ± 0.45                                | 26.85 ± 1.16                               | 0.87 ± 0.17                                  |
| <b>IP-10</b>                           | 1477.00 ± 423.47 | 647.46 ± 92.92                   | 300.88 ± 20.84                             | 816.43 ± 195.73                            | 398.81 ± 76.14                               |
| <b>KC</b>                              | 109.90 ± 21.33   | 3742.67 ± 468.76                 | 90.86 ± 25.27                              | 3921.67 ± 290.82                           | 59.02 ± 13.01                                |
| <b>MCP-1</b>                           | 733.01 ± 72.76   | 2742.33 ± 377.35                 | 526.79 ± 31.64                             | 3080.33 ± 276.73                           | 752.70 ± 37.47                               |
| <b>MIP-1<math>\alpha</math></b>        | 167.32 ± 15.79   | #14596                           | 164.44 ± 31.64                             | #11801.50 ± 594.68                         | 136.90 ± 7.27                                |
| <b>MIP-1<math>\beta</math></b>         | 461.63 ± 46.86   | >9967                            | 441.94 ± 14.42                             | >9967                                      | 335.25 ± 29.34                               |
| <b>MIP-2</b>                           | 637.85 ± 46.31   | >14319                           | 2116.33 ± 704.98                           | >14319                                     | 1144.40 ± 181.17                             |
| <b>RANTES</b>                          | 6.21 ± 1.69      | 80.11 ± 9.63                     | 3.38 ± 0.78                                | 84.47 ± 0.59                               | 3.65 ± 1.25                                  |
| <b>TNF<math>\alpha</math></b>          | 5.03 ± 0.69      | 127.58 ± 12.27                   | 6.35 ± 2.39                                | 122.10 ± 3.70                              | 4.55 ± 0.95                                  |

**Supplemental Table 5. Sequences for primers used in RT-qPCR.**

| <b>Gene</b>           | <b>Protein Target</b> | <b>Fwd</b>                           | <b>Rv</b>                             | <b>Source</b>                                     |
|-----------------------|-----------------------|--------------------------------------|---------------------------------------|---------------------------------------------------|
| <i>Actb</i>           | $\beta$ -Actin        | 5'-<br>GCAAGTGCTTCTAGG<br>CGGAC-3'   | 5''-<br>AAGAAAGGGTGTAAA<br>ACGCAGC-3' | Citation 1.                                       |
| <i>Ctsk</i>           | Cathepsin-<br>K       | 5'-<br>GAAGAAGACTCACCA<br>GAAGCAG-3' | 5'-<br>TCCAGGTTATGGGCA<br>GAGATT-3'   | Citations<br>2, 3-5.<br>Primer Bank<br>31982433a1 |
| <i>Nfatc1</i>         | NFATc1                | 5'-<br>CCCGTCACATTCTGGT<br>CCAT-3'   | 5'-<br>CAAGTAACCGTGTAG<br>CTGCACAA-3' | Citation 6.                                       |
| <i>Oscar</i>          | OSCAR                 | 5'-TGGCGGTTTGCA<br>CTCTTCA-3'        | 5'-GATCCGTTACCA<br>GCAGTTCCAGA-3'     | Citation 7.                                       |
| <i>Tnfrsf1<br/>1a</i> | RANK<br>Receptor      | 5'-GGACGGTGT<br>TGCAGCAGAT-3'        | 5'-GCAGTCTGA<br>GTTCCAGTGGTA-3'       | Citations<br>3-5.<br>Primer Bank<br>31981958a1    |

## References for Supplemental Table 5

1. An, D., Kim, K. & Lu, W. Defective Entry into Mitosis 1 (Dim1) Negatively Regulates Osteoclastogenesis by Inhibiting the Expression of Nuclear Factor of Activated T-cells, Cytoplasmic, Calcineurin-dependent 1 (NFATc1). *Journal of Biological Chemistry* **289**, 24366–24373 (2014).
2. Zhang, J. *et al.* Exercise-induced irisin in bone and systemic irisin administration reveal new regulatory mechanisms of bone metabolism. *Bone Res* **5**, (2017).
3. Spandidos, A., Wang, X., Wang, H. & Seed, B. PrimerBank: a resource of human and mouse PCR primer pairs for gene expression detection and quantification. *Nucleic Acids Res* **38**, D792–D799 (2010).
4. Spandidos, A. *et al.* A comprehensive collection of experimentally validated primers for Polymerase Chain Reaction quantitation of murine transcript abundance. *BMC Genomics* **9**, 1–17 (2008).
5. Wang, X. & Seed, B. A PCR primer bank for quantitative gene expression analysis. *Nucleic Acids Res* **31**, e154 (2003).
6. Luo, J. *et al.* LGR4 is a receptor for RANKL and negatively regulates osteoclast differentiation and bone resorption. *Nat Med* **22**, 539–546 (2016).
7. Cui, W. *et al.* CD200 and its receptor, CD200R, modulate bone mass via the differentiation of osteoclasts. *Proc Natl Acad Sci U S A* **104**, 14436 (2007).
